# Supplementary material
Source: publisher figshare collection journal article supplement (https://acs.figshare.com/ndownloader/files/24697580)
Supplement: Supplementary file 1 [file 24697580]

*Supporting Information*

**Self-protected CeO<sub>2</sub>-SnO<sub>2</sub>@SO<sub>4</sub><sup>2-</sup>/TiO<sub>2</sub> Catalysts with Extraordinary  
Resistance to Alkali and Heavy Metals for NO<sub>x</sub> Reduction**

Sixiang Cai,<sup>†, ‡, §</sup> Tuoyu Xu,<sup>†, ‡, §</sup> Penglu Wang,<sup>†, §</sup> Lupeng Han,<sup>†</sup> Sarawoot Impeng<sup>Ψ</sup>, Yue Li,<sup>‡</sup>

Tingting Yan,<sup>†</sup> Guorong Chen,<sup>†</sup> Liyi Shi<sup>†</sup> and Dongsong Zhang<sup>\*, †</sup>

<sup>†</sup>International Joint Laboratory of Catalytic Chemistry, Department of Chemistry, Research Center of Nano Science and Technology, College of Sciences, Shanghai University, Shanghai 200444, China.

<sup>‡</sup>State Key Laboratory of Marine Resource Utilization in South China Sea, School of Materials Science and Engineering, Hainan University, Haikou 570228, Hainan, China.

<sup>Ψ</sup>National Nanotechnology Center, National Science and Technology Development Agency, Pathum Thani 12120, Thailand.

<sup>§</sup>These authors contributed equally to this work.

\*Corresponding Author. E-mail: dszhang@shu.edu.cn; Tel: +86-21-66137152.

The Supporting Information includes 29 pages, 16 figures, and 4 tables.

## Table of Contents

|                                                          |     |
|----------------------------------------------------------|-----|
| Catalytic Performance .....                              | S3  |
| Bond Force Constant .....                                | S3  |
| Catalytic Characterization .....                         | S4  |
| Computational method and model for DFT calculations..... | S5  |
| Figure S1 .....                                          | S7  |
| Figure S2 .....                                          | S8  |
| Figure S3 .....                                          | S9  |
| Figure S4 .....                                          | S10 |
| Figure S5 .....                                          | S11 |
| Figure S6 .....                                          | S12 |
| Figure S7 .....                                          | S13 |
| Figure S8 .....                                          | S14 |
| Figure S9 .....                                          | S15 |
| Figure S10 .....                                         | S16 |
| Figure S11 .....                                         | S17 |
| Figure S12 .....                                         | S18 |
| Figure S13 .....                                         | S19 |
| Figure S14 .....                                         | S20 |
| Figure S15 .....                                         | S21 |
| Figure S16 .....                                         | S22 |
| Table S1.....                                            | S23 |
| Table S2.....                                            | S24 |
| Table S3.....                                            | S25 |
| Table S4.....                                            | S26 |
| References.....                                          | S27 |

## Catalytic Performance

SCR activity tests were performed on a multi-function catalyst characterization system (VDRT-200SMT). The powders of catalysts were pressed, crushed and sieved to 20-40 mesh, then the processed samples were put into a quartz tube with 8 mm inside diameter. The reactant gases were as follow: 500 ppm NO, 500 ppm NH<sub>3</sub>, 5% O<sub>2</sub>, 8 vol% H<sub>2</sub>O (when used), 100 ppm SO<sub>2</sub> (when used) and N<sub>2</sub> (be used as carrier gas). The concentrations of outlet gas (NO, NO<sub>2</sub>, N<sub>2</sub>O, NH<sub>3</sub>) were recorded by an FTIR spectrometer (Thermo Fisher). The NO conversion, N<sub>2</sub> selectivity and specific reaction rate were calculated by the following equations<sup>1</sup>:

$$NO_x \text{ conversion}(\%) = \frac{[NO_x]_{in} - [NO_x]_{out}}{[NO_x]_{in}} \times 100\% \quad (1)$$

$$N_2 \text{ selectivity}(\%) = \left( 1 - \frac{2[N_2O]}{[NH_3]_{in} + [NO_x]_{in} - [NH_3]_{out} - [NO_x]_{out}} \right) \times 100\% \quad (2)$$

Where  $[NO_x]_{in}$  (ppm) and  $[NO_x]_{out}$  (ppm) are the inlet and outlet gas NO<sub>x</sub> concentration,  $[NH_3]_{in}$  (ppm) and  $[NH_3]_{out}$  (ppm) are the inlet and outlet gas NH<sub>3</sub> concentration and  $[N_2O]$  (ppm) is the outlet gas N<sub>2</sub>O concentration, respectively.

$$\text{Specific reaction rate} = \frac{\frac{PV}{RT} \cdot Q \cdot X_{NO_x}}{w \cdot S_{BET}} \quad (3)$$

Where  $P=1.01$  MPa,  $V=22.4$  L/mol,  $R=8.314$  J/mol<sup>-1</sup>·K<sup>-1</sup>,  $T$  refers to the test temperature (K),  $Q$  is volume velocity (ml/min),  $X_{NO_x}$  is NO<sub>x</sub> conversion,  $w$  is the mass of the catalyst and  $S_{BET}$  is the specific surface area of the catalyst, respectively.

## Bond Force Constant

The Ti-O bond force constant is obtained by the follow Formula:<sup>2</sup>

$$\omega = \frac{1}{2\pi c} \sqrt{\frac{k}{\mu}}$$

where  $\omega$  is the Raman shift (cm<sup>-1</sup>),  $c$  is light velocity, and  $\mu$  is effective mass.

## Catalytic Characterization

**Morphology.** Scanning electron microscope (SEM) images were photoed by a field-emission scanning electron microscopy (FE-SEM, SIGMA-300). EDS (Energy Dispersive Spectroscopy) mapping of catalysts were completed on Oxford Instruments EDS.

**Textural and Structural Properties.** X-ray diffraction (XRD) was performed on an X-ray diffractometer (3KW D/MAX2200V PC, Japan) with a scan speed of  $8^{\circ} \cdot \text{min}^{-1}$ .<sup>3</sup> The Raman (LabRAM HR Evolution, Horiba, France) test was obtained by using Raman spectrometer with the laser at 532 nm as the excitation source.<sup>4</sup> X-ray photoelectron spectrometry (XPS) was carried out on an X-ray photoelectron spectrometer (Thermo Scientific, ESCALAB250Xi), all binding energies were corrected by the containment carbon peak ( $\text{C } 1s = 284.6 \text{ eV}$ ).<sup>5</sup> Nitrogen adsorption-desorption isotherms were recorded by a specific surface area and porosity analyzer (micromeritics, ASAP 2460). The catalysts were put into Dewar flask to de-gas by a micromeritics sample degas system (VacPrep 061) for 12h at 300 °C. The mesopore sizes were calculated by Barrett-Joyner-Halenda (BJH) method.<sup>6</sup> The XPS sputtering experiment was tested by a X-ray photoelectron spectroscopy (ThermoFischer, ESCALAB 250Xi). Among them, the vacuum of the analysis chamber is  $8 \times 10^{-10}$  pa, the excitation source is Al ka ray ( $h\nu=1486.8 \text{ eV}$ ), the operating voltage is 12.5 kV, the filament current is 16 mA, and the signals are accumulated for 5 cycles. Argon ion gun is used to clean the surface, the spot size is a circle with diameter 2 mm, ion energy is 3000 eV, etching time is 1 min, Passing-Energy is 40 eV, step length is 0.1 eV, charge correction is carried out with  $\text{C } 1s=284.60 \text{ eV}$  binding energy as energy standard.

**Chemisorption Properties.** The Ammonia temperature-programmed desorption ( $\text{NH}_3$ -TPD) tests were performed on a Micromeritics AutoChem 2920 II instrument with thermal conductivity

detector (TCD).<sup>7</sup> First, catalyst powder (80 mg) were put into a U-shaped quartz tube and pretreated in the He gas flow of 30 ml·min<sup>-1</sup> for 30 minutes at 100 °C. After cooling to 100 °C, the samples was exposed to NH<sub>3</sub>/He atmosphere for 1 hour. Then the catalyst was purged by He for 1 h at this temperature to remove the physically adsorbed NH<sub>3</sub> on the surface of samples. Finally, the temperature was raised to 850 °C by a heating rate of 10 °C·min<sup>-1</sup>, meanwhile, the desorption curve of NH<sub>3</sub> was recorded. The hydrogen temperature-programmed reduction (H<sub>2</sub>-TPR) tests were performed on the Micromeritics AutoChem 2920 II instrument as well. First, catalyst powder (80 mg) was put into a U-shaped quartz tube and pretreated in the He gas flow of 30 ml·min<sup>-1</sup> for 30 minutes at 100 °C. After cooling to room temperature, the samples were exposed to H<sub>2</sub>/Ar atmosphere, then the temperature was raised to 750 °C by a rate of 10 °C·min<sup>-1</sup> and the reduction curve was recorded.

**Infrared Spectroscopy.** Both of pyridine-infrared spectroscopy (IR) and in situ diffuse reflectance infrared Fourier transform spectroscopy (in situ DRIFTS) experiments were performed on a Nicolet 6700 spectrometer with a liquid nitrogen cooled mercury cadmium telluride (MCT) detector.<sup>8</sup> The DRIFTS spectra were collected in the range of 1000-1800 cm<sup>-1</sup> in Kubelka-Munk format, accumulating 64 scans at 4 cm<sup>-1</sup> resolution. First, each catalysts were pretreated at 300 °C for 30 min under a 30 ml·min<sup>-1</sup> N<sub>2</sub> flow. After cooling to 100 °C, record this spectra as background. The catalysts were exposed to 500ppm NH<sub>3</sub> (NO + O<sub>2</sub>) for 1h, deducted the background and recorded the spectra. Then the ingas was switched to N<sub>2</sub> to remove the physically adsorbed NH<sub>3</sub> (nitrate) species. Finally, N<sub>2</sub> was turned off and 500ppm NO + O<sub>2</sub> (NH<sub>3</sub>) was introduced, meanwhile the spectrum were recorded by a frequency of once a minute until 20 min.

## **Computational method and model for DFT calculations**

Spin-polarized DFT calculations were carried out using the Vienna *Ab initio* Simulation Package

111 (VASP).<sup>9</sup> The Perdew-Burke-Ernzerhof (PBE) functional and the projector augmented wave (PAW)  
 112 method were used.<sup>10, 11</sup> To account for van der Waals (vdW) interaction, the DFT-D3 method of  
 113 Grimme was utilized.<sup>12</sup> For geometry optimizations, the force and energy convergences were 0.02  
 114 eV/Å and 10<sup>-5</sup> eV, respectively. A plane wave energy cutoff was opted at 400 eV. Brillouin zone  
 115 sampling was performed using a 3 × 3 × 1 Monkhorst-Pack grid.<sup>13</sup> The DFT + U was applied to address  
 116 the on-site Coulomb interaction with the U-J parameters of 3.5 eV for Ti 3d.<sup>14</sup>

117 The TiO<sub>2</sub> (101) and Ti(SO<sub>4</sub>)<sub>2</sub> (21 $\bar{3}$ ) surfaces were modeled using periodic slabs of (1 × 3) and (1  
 118 × 1), respectively. A vacuum space of 18 Å was added in the direction perpendicular to the surface to  
 119 prevent interactions between periodic images.

120 The combination energy of each chemical species on catalyst surfaces is defined as:

$$121 \quad E_{\text{com}} = E_{\text{species/surface}} - (E_{\text{species}} + E_{\text{surface}})$$

122 where  $E_{\text{species/surface}}$  is the total energy of species/surface complex, and  $E_{\text{species}}$  and  $E_{\text{surface}}$  are the  
 123 total energies of corresponding species and surface, respectively. Accordingly, the more negative value  
 124 indicates the stronger combination.

125

126

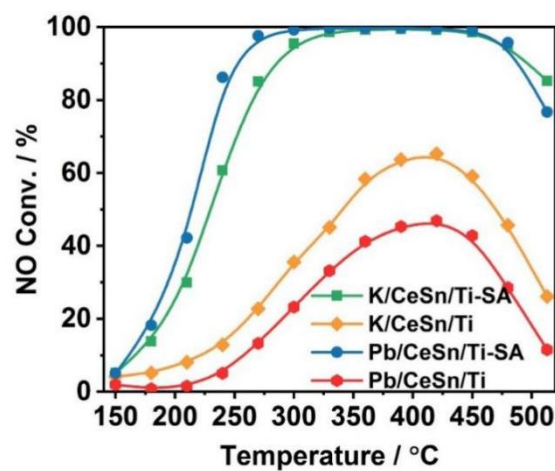

127

128 **Figure S1.** Plots of NO<sub>x</sub> conversion *versus* temperature for K/CeSn/Ti-SA, K/CeSn/Ti, Pb/CeSn/Ti-  
 129 SA and Pb/CeSn/Ti. Reaction conditions: 500 ppm NO, 500 ppm NH<sub>3</sub>, 5 vol % O<sub>2</sub>, N<sub>2</sub> as the balance  
 130 gas, and GHSV of 50,000 h<sup>-1</sup>.

131 For CeSn/Ti-SA catalysts, only a slight decrease of the NH<sub>3</sub>-SCR activity can be observed at low  
 132 temperature range after the loading of K or Pb. On the contrary, the maximum de-NO<sub>x</sub> performance of  
 133 CeSn/Ti catalysts only preserved about 60% and 43% after K and Pb poisoning, respectively.

134

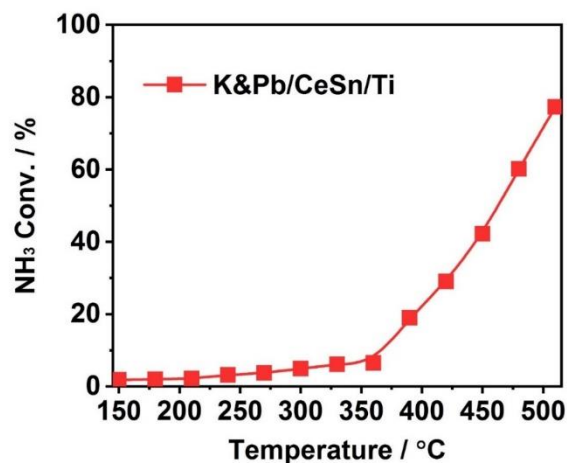

**Figure S2.** Plots of NH<sub>3</sub> conversion *versus* temperature for K&Pb/CeSn/Ti-SA catalysts. Reaction conditions: 500 ppm NH<sub>3</sub>, 5 vol % O<sub>2</sub>, N<sub>2</sub> as the balance gas, and GHSV of 50,000 h<sup>-1</sup>.

Since the acid sites on the surface of CeSn/Ti were consumed after K&Pb co-poisoning, the adsorption of NO become easier than NH<sub>3</sub>, leading to the reaction of NH<sub>3</sub> oxidation at higher temperatures and the decrease of N<sub>2</sub> selectivity.<sup>15</sup>

NH<sub>3</sub> conversion was calculated by the following equality:<sup>16</sup>

$$NH_3 \text{ conversion}(\%) = \frac{[NH_3]_{in} - [NH_3]_{out}}{[NH_3]_{in}} \times 100\%$$



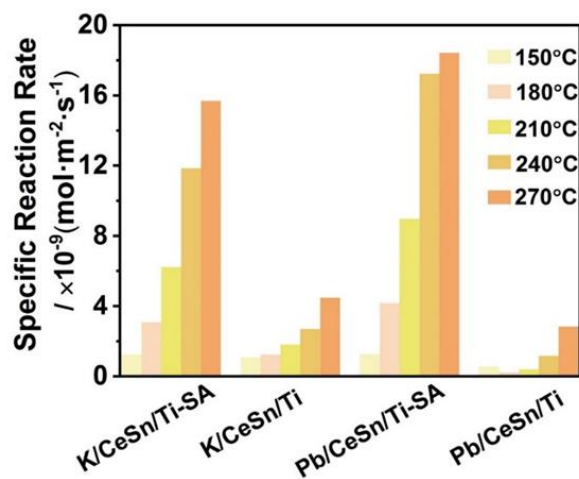

**Figure S3.** Plots of specific reaction rates over different temperature for K/CeSn/Ti-SA, K/CeSn/Ti, Pb/CeSn/Ti-SA and Pb/CeSn/Ti.

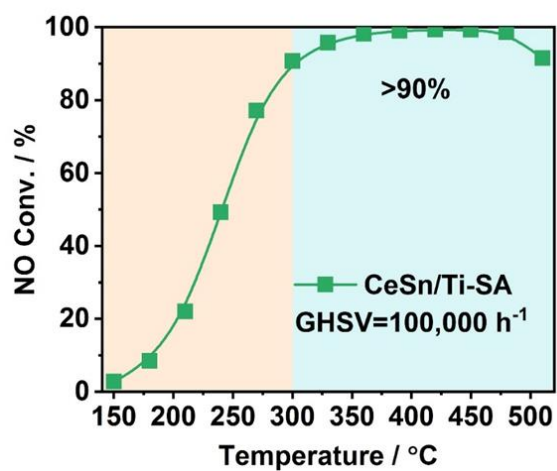

149

150 **Figure S4.** Plots of NO conversion as a function of reaction temperature for the catalysts of CeSn/Ti-  
 151 SA. Reaction conditions: 500 ppm NO, 500 ppm NH<sub>3</sub>, 5 vol % O<sub>2</sub>, N<sub>2</sub> as the balance gas, and GHSV  
 152 of 100,000 h<sup>-1</sup>.

153 CeSn/Ti-SA catalysts hold an activity above 90% within the range of 300~510°C under high GHSV  
 154 of 100,000 h<sup>-1</sup>.

155

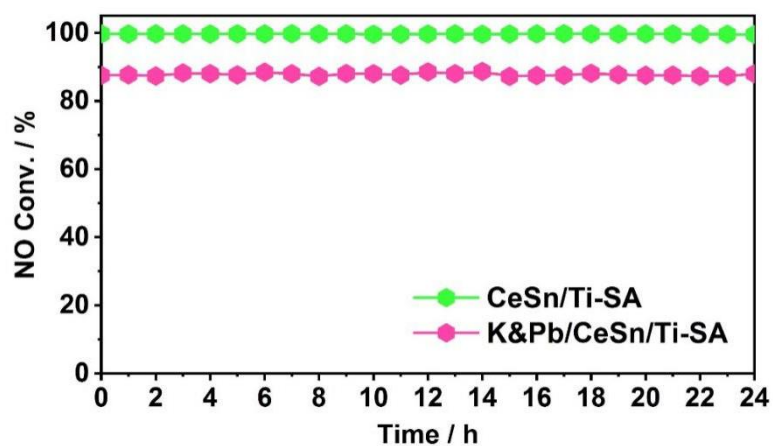

**Figure S5.** Plots of stability test for CeSn/Ti-SA and K&Pb/ CeSn/Ti-SA at 300°C for 24 h. Reaction conditions: 500 ppm NO, 500 ppm NH<sub>3</sub>, 5 vol % O<sub>2</sub>, N<sub>2</sub> as the balance gas, and GHSV of 50,000 h<sup>-1</sup>.

160

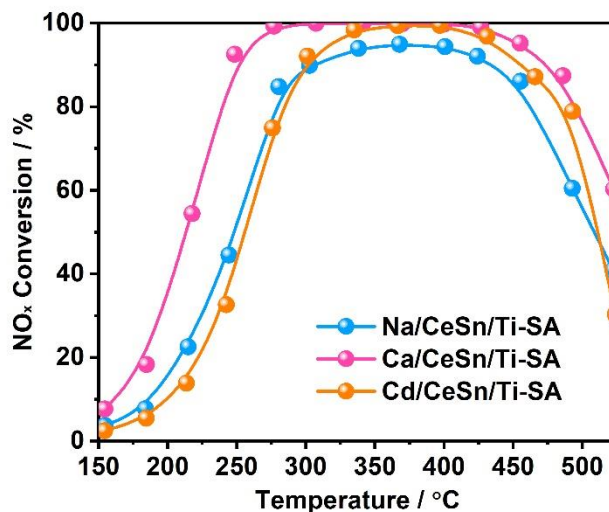

161

162 **Figure S6.** Plots of NO<sub>x</sub> conversion *versus* temperature for Na/CeSn/Ti-SA, Ca/CeSn/Ti and  
 163 Cd/CeSn/Ti-SA. Reaction conditions: 500 ppm NO, 500 ppm NH<sub>3</sub>, 5 vol % O<sub>2</sub>, N<sub>2</sub> as the balance gas,  
 164 and GHSV of 50,000 h<sup>-1</sup>.

165 Since Na is one of the main components of alkali metals in fly ash, Ca is the main component of  
 166 alkaline earth metals in fly ash, and Cd is the heavy metal in municipal solid waste incinerator second  
 167 only to Pb. It is of great significance to investigate the resistance of catalysts to these poisons.<sup>17</sup> The  
 168 results in Figure S6 shown that the CeSn/Ti-SA catalysts had good resistance to Na, Ca and Cd. Among  
 169 these three poisons, CaO had the least effect on the activity of the catalyst, followed by CdO and Na<sub>2</sub>O.  
 170 The effect of CaO on the activity of the catalyst was mainly concentrated in the high temperature  
 171 section, especially the activity decreased obviously above 450°C. While the effects of CdO and Na<sub>2</sub>O  
 172 on the catalysts were not only at high temperature but also at low temperature.

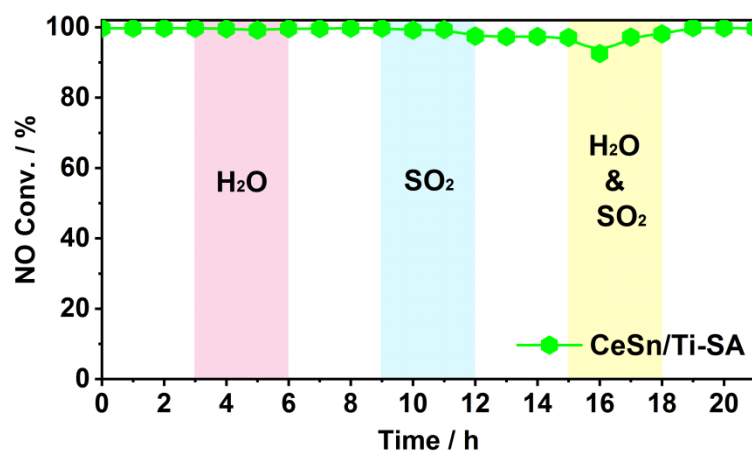

**Figure S7.** Plots of H<sub>2</sub>O, SO<sub>2</sub> and H<sub>2</sub>O&SO<sub>2</sub> durability test for the CeSn/Ti-SA catalyst at 300 °C.

Reaction conditions: 500 ppm NO, 500 ppm NH<sub>3</sub>, 5 vol % O<sub>2</sub>, 8 vol % H<sub>2</sub>O (when used), 100 ppm

SO<sub>2</sub> (when used), N<sub>2</sub> as the balance gas, and GHSV of 50,000 h<sup>-1</sup>.

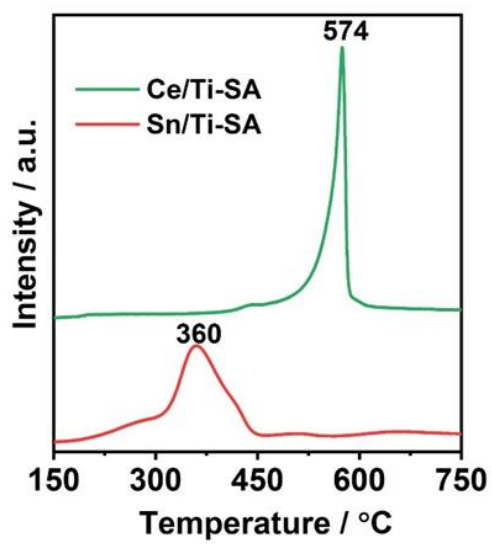

**Figure S8.** H<sub>2</sub>-TPR curves of Ce/Ti-SA and Sn/Ti-SA.

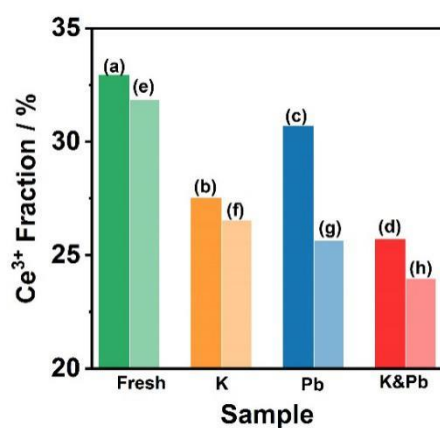

**Figure S9.** Ce<sup>3+</sup> fraction obtained by the XPS spectra of Ce 3d for (a) CeSn/Ti-SA, (b) K/CeSn/Ti-SA, (c) Pb/CeSn/Ti-SA, (d) K&Pb/CeSn/Ti-SA, (e) CeSn/Ti, (f) K/CeSn/Ti, (g) Pb/CeSn/Ti and (h) K&Pb/CeSn/Ti.

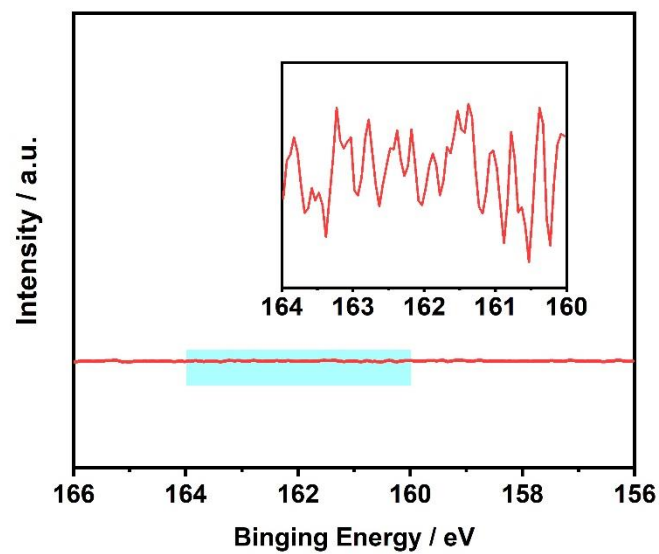

**Figure S10.** XPS spectra of S 2p for CeSn/Ti-SA at ~162 eV. The inset is the magnified one of the blue zone.



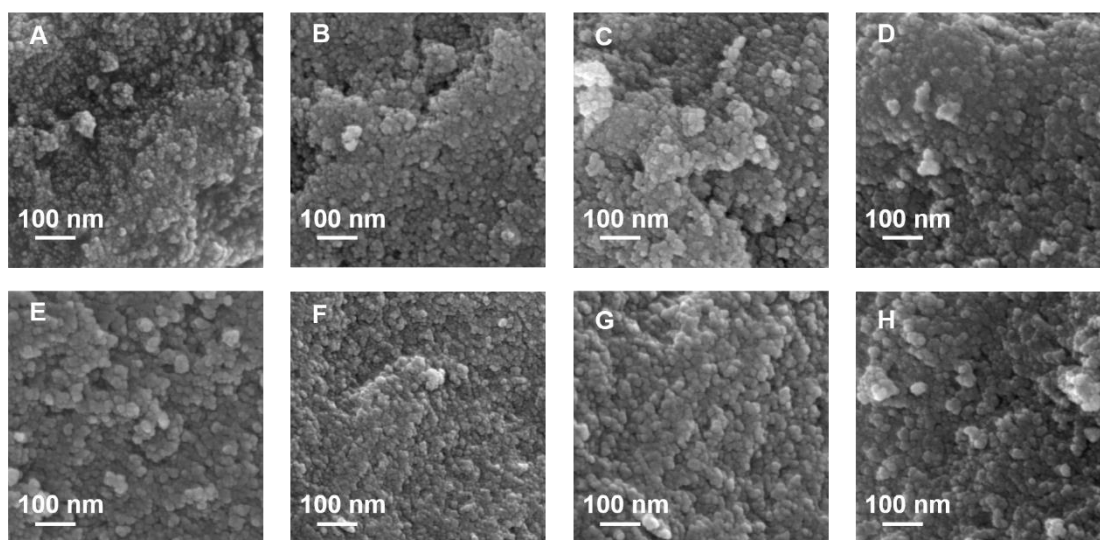

**Figure S11.** SEM images of (A) CeSn/Ti-SA, (B) K/CeSn/Ti-SA, (C) Pb/CeSn/Ti-SA, (D) K&Pb/CeSn/Ti-SA, (E) CeSn/Ti, (F) K/CeSn/Ti, (G) Pb/CeSn/Ti and (H) K&Pb/CeSn/Ti.

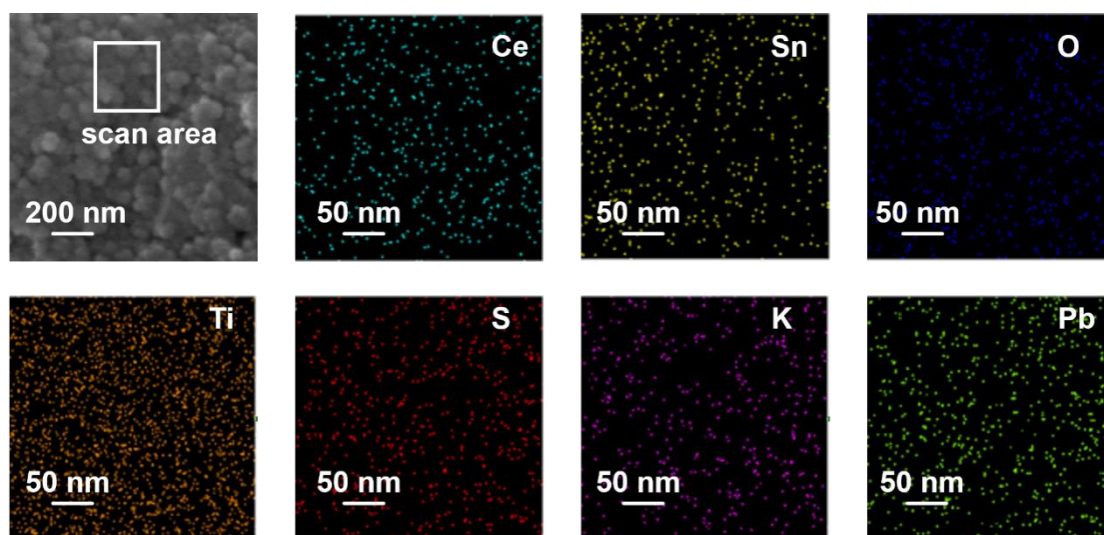

**Figure S12.** EDS mapping of the K&Pb/CeSn/Ti-SA.

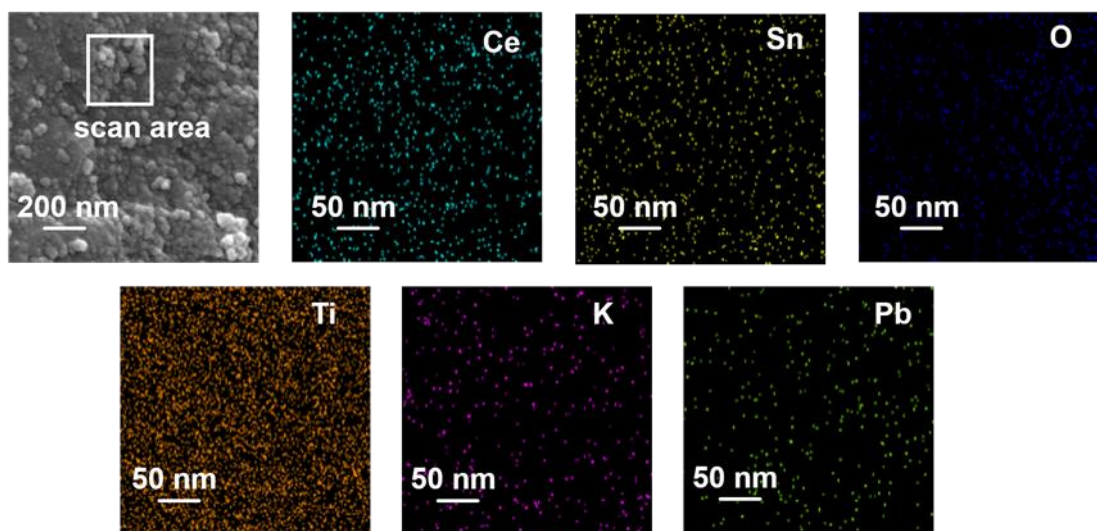

**Figure S13.** EDS mapping of the K&Pb/CeSn/Ti.

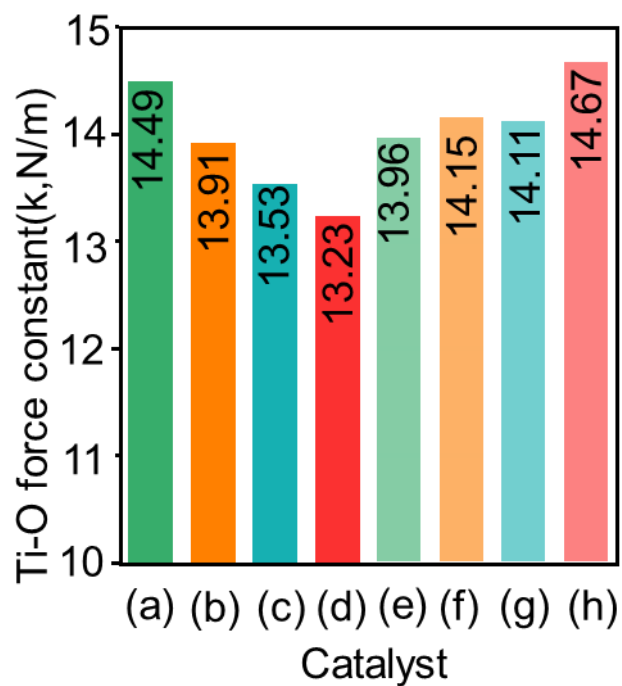

**Figure S14.** The Ti-O bond force constant in Eg (v6) mode of anatase phase  $\text{TiO}_2$  for (a) CeSn/Ti-SA, (b) K/CeSn/Ti-SA, (c) Pb/CeSn/Ti-SA (d) K&Pb/CeSn/Ti-SA, (e) CeSn/Ti, (f) K/CeSn/Ti, (g) Pb/CeSn/Ti and (h) K&Pb/CeSn/Ti,

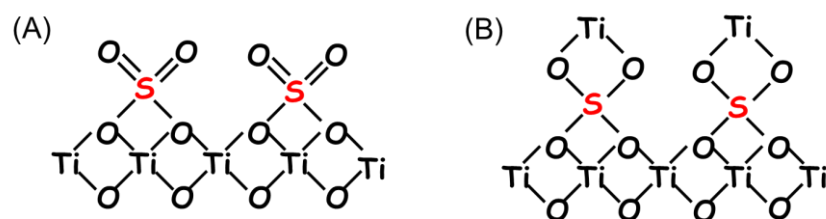

**Figure S15.** The bonding state of (A) sulfates on the surface of titanium dioxide and (B) sulfates in the bulk phase of titanium dioxide.

Referring to the bonding mode of sulfate on the surface of zirconium dioxide in the literatures of *J. Colloid Interface Sci.* **2013**, 394, 515-521 and *J. Phys. Chem. C* **2015**, 119, 15077-15084, similarly, we establish the DFT model of sulfate bonding on the surface of titanium dioxide by placing sulfate groups on the surface of titanium dioxide (Figure S15A), in which only one kind of bonding state of S-O-Ti bonds existed.<sup>17,18</sup> However, there are other possibilities for the bonding state between sulfate and titanium dioxide, especially in the bulk phase, as the bonding mode shown in Figure S15B, which was very close to the bonding state in titanium sulfate. Therefore, the model of  $\text{Ti}(\text{SO}_4)_2$  was selected as the ideal cases of sulfates present more in the bulk phase of  $\text{TiO}_2$ .

219

220

221

222

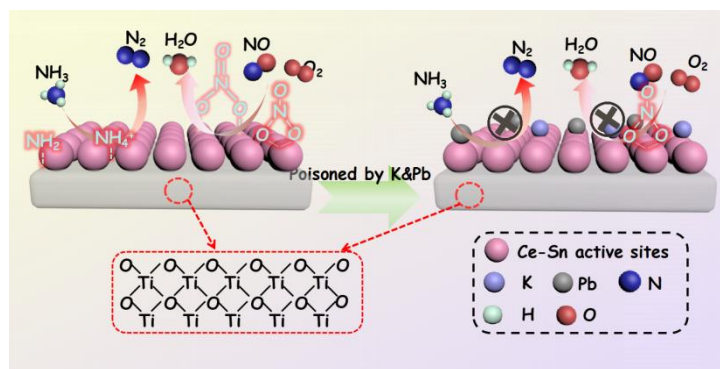

**Figure S16.** The deactivation mechanism of K&Pb/CeSn/Ti.

223

**Table S1.** Specific surface areas ( $S_{\text{BET}}$ :  $\text{m}^2/\text{g}$ ) of fresh and poisoned catalysts.

| Catalyst   | Fresh | Pb-poisoned | K-poisoned | K&Pb co-poisoned |
|------------|-------|-------------|------------|------------------|
| CeSn/Ti-SA | 102   | 86          | 84         | 79               |
| CeSn/Ti    | 101   | 81          | 75         | 66               |

224

225

**Table S2.** The amount of NH<sub>3</sub> desorption (mmol/g) of fresh and poisoned catalysts.

| Sample          | Weak acid | Middle acid | Strong acid | Super acid |
|-----------------|-----------|-------------|-------------|------------|
| CeSn/Ti-SA      | 0.46571   | 0.12059     | /           | 1.119      |
| K/CeSn/Ti-SA    | 0.44076   | 0.10795     | /           | 0.63698    |
| Pb/CeSn/Ti-SA   | 0.4497    | 0.10031     | /           | 0.62323    |
| K&Pb/CeSn/Ti-SA | 0.3062    | 0.00723     | /           | 0.32073    |
| CeSn/Ti         | 0.45294   | 0.12058     | 0.04328     | /          |
| K/CeSn/Ti       | 0.11923   | 0.00285     | /           | /          |
| Pb/CeSn/Ti      | 0.26007   | 0.02748     | 0.00722     | /          |
| K&Pb/CeSn/Ti    | 0.09771   | 0.00211     | /           | /          |

226

These data was obtained from NH<sub>3</sub>-TPD results.

227



**Table S3.** Normalized Brønsted acid and Lewis acid (μmol/g) of fresh and poisoned catalysts.

| Sample          | Lewis acid            |                       |                       | Brønsted acid         |                       |
|-----------------|-----------------------|-----------------------|-----------------------|-----------------------|-----------------------|
|                 | 1444 cm <sup>-1</sup> | 1575 cm <sup>-1</sup> | 1602 cm <sup>-1</sup> | 1540 cm <sup>-1</sup> | 1640 cm <sup>-1</sup> |
| CeSn/Ti-SA      | 204                   | 60                    | 226                   | 134                   | 187                   |
| K/CeSn/Ti-SA    | 187                   | 55                    | 154                   | 110                   | 172                   |
| Pb/CeSn/Ti-SA   | 105                   | 48                    | 102                   | 74                    | 126                   |
| K&Pb/CeSn/Ti-SA | 91                    | 26                    | 86                    | 40                    | 68                    |
| CeSn/Ti         | 161                   | 58                    | 124                   | /                     | 137                   |
| K/CeSn/Ti       | 71                    | 32                    | 62                    | /                     | 27                    |
| Pb/CeSn/Ti      | 103                   | 60                    | 100                   | /                     | 23                    |
| K&Pb/CeSn/Ti    | 58                    | 19                    | 56                    | /                     | 14                    |

These data was obtained from Py-IR results.

The Normalized Lewis acid and Brønsted acid were calculated by the following equations:<sup>20</sup>

$$C(\text{pyridine on B sites}) = 1.88IA(B)R^2/W$$

$$C(\text{pyridine on L sites}) = 1.42IA(L)R^2/W$$

IA(B.L) = integrated absorbance of B or L band ( cm<sup>-1</sup>)

R = radius of catalyst disk (cm<sup>-1</sup>)

W = weight of sample (mg)

237

**Table S4.** Atomic ratio of each element divided by titanium atom.

| Sample          | Ce/Ti  | Sn/Ti  | O/Ti   | S/Ti   | Pb/Ti  | K/Ti   |
|-----------------|--------|--------|--------|--------|--------|--------|
| CeSn/Ti-SA      | 0.0950 | 0.0971 | 2.3638 | /      | /      | /      |
| K/CeSn/Ti-SA    | 0.1338 | 0.0916 | 2.5123 | 0.0859 | /      | 0.0104 |
| Pb/CeSn/Ti-SA   | 0.1109 | 0.0616 | 2.4425 | 0.0993 | 0.0198 | /      |
| K&Pb/CeSn/Ti-SA | 0.1416 | 0.0827 | 2.6579 | 0.1309 | 0.0278 | 0.0507 |

238

These data was obtained from XPS results.

## References

- (1) Huang, L.; Zha, K.; Namuangruk, S.; Junkaew, A.; Zhao, X.; Li, H.; Shi, L.; Zhang, D., Promotional effect of the TiO<sub>2</sub> (001) facet in the selective catalytic reduction of NO with NH<sub>3</sub>: in situ DRIFTS and DFT studies. *Catal. Sci. Technol.* **2016**, *6*, (24), 8516-8524.
- (2) Rong, S.; Zhang, P.; Liu, F.; Yang, Y., Engineering crystal facet of  $\alpha$ -MnO<sub>2</sub> nanowire for highly efficient catalytic oxidation of carcinogenic airborne formaldehyde. *ACS Catal.* **2018**, *8*, (4), 3435-3446.
- (3) Yoo, J. S.; Bhattacharyya, A. A.; Radlowski, C. A., De-SO<sub>x</sub> catalyst: an XRD study of magnesium aluminate spinel and its solid solutions. *Ind. Eng. Chem. Res.* **1991**, *30*, (7), 1444-1448.
- (4) Akins, D. L.; Macklin, J. W.; Zhu, H. R., ChemInform abstract: visible Raman and near-infrared fourier transform raman characterization of adsorbed 4,4'-cyanine. *J. Phys. Chem. C* **1992**, *96*, (11): 4515-4521.
- (5) Gardner, T. H.; Spivey, J. J.; Kugler, E. L.; Campos, A.; Hissam, J. C.; Roy, A. D., Structural characterization of ni-substituted hexaaluminate catalysts using E EXAFS, XANES, XPS, XRD, and TPR. *J. Phys. Chem. C* **2010**, *114*, (17), 7888-7894.
- (6) Strømme, M.; Mihranyan, A.; Ek, R.; Niklasson, G. A., Fractal dimension of cellulose powders analyzed by multilayer BET adsorption of water and nitrogen. *The J. Phys. Chem. B* **2003**, *107*, (51), 14378-14382.
- (7) Watanabe, S.; Ma, X.; Song, C., Characterization of structural and surface properties of nanocrystalline TiO<sub>2</sub>-CeO<sub>2</sub> mixed oxides by XRD, XPS, TPR, and TPD. *J. Phys. Chem. C* **2009**, *113*, (32): 14249-14257.

- (8) Wang, X.; Liu, Y.; Zhang, T.; Luo, Y.; Lan, Z.; Zhang, K.; Zuo, J.; Jiang, L.; Wang, R., Geometrical-site-dependent catalytic activity of ordered mesoporous Co-based spinel for benzene oxidation: in situ DRIFTS study coupled with Raman and XAFS spectroscopy. *ACS Catal.* **2017**, 7, (3), 1626-1636.
- (9) Kresse, G.; Furthmüller, J., Efficient iterative schemes for ab initio total-energy calculations using a plane-wave basis set. *Phys. Rev. B* **1996**, 54, (16), 11169-11186.
- (10) Perdew, J. P.; Burke, K.; Ernzerhof, M., Generalized Gradient Approximation Made Simple. *Phys. Rev. Lett.* **1996**, 77, (18), 3865-3868.
- (11) Kresse, G.; Joubert, D., From ultrasoft pseudopotentials to the projector augmented-wave method. *Phys. Rev. B* **1999**, 59, (3), 1758-1775.
- (12) Grimme, S.; Antony, J.; Ehrlich, S.; Krieg, H., A consistent and accurate ab initio parametrization of density functional dispersion correction (DFT-D) for the 94 elements H-Pu. *J. Chem. Phys.* **2010**, 132, (15), 154104.
- (13) Monkhorst, H. J.; Pack, J. D., Special points for Brillouin-zone integrations. *Phys. Rev. B* **1976**, 13, (12), 5188-5192.
- (14) Dudarev, S. L.; Botton, G. A.; Savrasov, S. Y.; Humphreys, C. J.; Sutton, A. P., Electron-energy-loss spectra and the structural stability of nickel oxide: An LSDA+U study. *Phys. Rev. B* **1998**, 57, (3), 1505-1509.
- (15) Han, L.; Gao, M.; Hasegawa, J. Y.; Li, S.; Shen, Y.; Li, H.; Shi, L.; Zhang, D., SO<sub>2</sub>-Tolerant selective catalytic reduction of NO<sub>x</sub> over meso-TiO<sub>2</sub>@Fe<sub>2</sub>O<sub>3</sub>@Al<sub>2</sub>O<sub>3</sub> metal-based monolith catalysts. *Environ. Sci. Technol.* **2019**, 53, (11), 6462-6473.

- 281 (16)Wang, P.; Chen, S.; Gao, S.; Zhang, J.; Wang, H.; Wu, Z., Niobium oxide confined by ceria  
282 nanotubes as a novel SCR catalyst with excellent resistance to potassium, phosphorus, and lead.  
283 *Appl. Catal., B: Environ.* **2018**, *231*, 299-309.
- 284 (17)Lin, M.; An, B.; Niimi, N.; Jikihara, Y.; Nakayama, T.; Honma, T.; Takei, T.; Shishido, T.; Ishida,  
285 T.; Haruta, M.; Murayama, T., Role of the acid site for selective catalytic oxidation of NH<sub>3</sub> over  
286 Au/Nb<sub>2</sub>O<sub>5</sub>. *ACS Catal.* **2019**, *9*, (3), 1753-1756.
- 287 (18)Gao, S.; Chen, X.; Wang, H.; Mo, J.; Wu, Z.; Liu, Y.; Weng, X., Ceria supported on sulfated  
288 zirconia as a superacid catalyst for selective catalytic reduction of NO with NH<sub>3</sub>. *J. Colloid*  
289 *Interface Sci.* **2013**, *394*, 515-521.
- 290 (19)Wang, H.; Gao, S.; Yu, F.; Liu, Y.; Weng, X.; Wu, Z. Effective way to control the performance  
291 of a ceria-based deNO<sub>x</sub> catalyst with improved alkali resistance: acid–base adjusting. *J. Phys.*  
292 *Chem. C* **2015**, *119*, (27), 15077-15084.
- 293 (20)Zhifei Hao, Z. S., Yi Li, Haitao Wang, Lirong Zheng, Ruihua Wang, Guoquan Liu, and; Zhan, S.,  
294 The role of alkali metal in  $\alpha$ -MnO<sub>2</sub> catalyzed ammonia - selective catalysis. *Angew. Chem. Int.*  
295 *Ed.* **2019**, *58*, 6351 -6356.
